# Supplementary material for: Synthesis and luminescence properties of four-armed conjugated structures containing 1,3,4-oxadiazole moietiesElectronic supplementary information (ESI) available: synthesis details. See http://www.rsc.org/suppdata/jm/b3/b302568c/
Source: Royal Society of Chemistry journal article supplement (doi:10.1039/b302568c), 2003-01-01
Supplement: b302568c.doc [file b302568c.doc]

# Electronic Supplementary Information

**(Article Ref.: B302568C)**

**Synthesis and Luminescence Properties of Four-armed Conjugated Structures Containing 1,3,4-Oxadiazole Moieties**

Soon Wook Cha, Seong-Ho Choi, Kyungkon Kim and Jung-Il Jin*

# *Synthesis*

2-(4-Bromophenyl)-5-(4-*t*-butylphenyl)-1,3,4-oxadiazole (**1a**):

The mixture of methyl 4-bromobenzoate (30.0 g, 0.20 mol) and hydrazine monohydrate (31.2 g, 0.62 mol) were refluxed for 24 h in 600 mL of ethanol. After the reaction was completed, the mixture were cooled to room temperature, and then poured into cold water to precipitate the white solid, which was collected on a filter and washed with hexane and small amount (ca. 100 mL) of cold water to remove the unreacted starting materials. The product, 4-bromobenzhydrazide, was dried for 1 h by vacuum filtration followed by drying in a vacuum oven for 1 day. The product yield was 83 % (24.9 g).

17.8 g (0.10 mol) of 4-*t*-butylbenzoic acid was added to 50 mL of SOCl2 and refluxed for 6 h to give 4-*t*-butylbenzoyl chloride. The excess SOCl2 was removed by vacuum distillation and the reaction mixture was cooled to room temperature. After 30 min, 20.0 g (0.13 mol) of 4-bromobenzylhydrazide dissolved in 200 mL of pyridine were added to the reaction flask containing 4-*t*-butylbenzoyl chloride through a dropping funnel over a period of 20 min. After being stirred for 2 h, the reaction mixture was poured into distilled water. The product was collected on a filter and washed with water and then dried in a vacuum oven. The yield was 79 % (24.5 g).

The product (24 g, 77.4 mmol) was placed in a 500 mL 2-necked round bottomed flask. POCl3 (250 mL) was added to the flask. The mixture was refluxed for 6 h under nitrogen atmosphere. After the completion of the reaction, the reaction mixture was slowly poured into cold water in a ice bath and 0.5 M NaOH solution was added to neutralize the reaction mixture. Then the precipitate was collected on a filter, washed with distilled water, and finally recrystallized from ethanol/water = 3:1 (v/v). The yield was 84 % (19.0 g). m.p.: 134 oC. 1H NMR (300 MHz, acetone-*d*6, ppm) : 1.4 (s, 9H, -ArC(C*H*3)3), 7.7-7.8 (m, 8H, aromatic C-*H*). FTIR (KBr, cm-1): 3064 (aromatic C-H stretching), 2962 (aliphatic C-H stretching), 1602, 1474 (aromatic C=C stretching), 1577 (C=N stretching), 1011 (C-O stretching), 725 (aromatic =C-H out-of plane vibration). Elemental analysis: Calcd. [%] For C18H17BrN2O: C, 60.52; H, 4.80; N, 7.84. Found: C, 60.48 ; H, 4.76 ; N, 7.89.

2-(4-Bromophenyl)-5-(4-dodecyloxyphenyl)-1,3,4-oxadiazole (**1b**):

Compound **1b** was synthesized in the same manner as described above in the preparation of compound **1a**. m.p.: 101 oC.

1H NMR (300 MHz, CDCl3, ppm): 0.85-1.84 (m, 23H, -OCH2(CH2)10CH3), 4.00-4.04 (t, 2H, -OCH2), 6.98-7.01 (d, 2H, Ar-H), 7.62-7.65 (d, 2H, Ar-H), 8.02-8.09 (m, 4H, Ar-H),. FTIR (KBr, cm-1): 3058 (aromatic C-H stretching), 2966 (aliphatic C-H stretching), 1596, 1494 (aromatic C=C stretching), 1575 (C=N stretching), 1013 (C-O stretching). Elemental analysis: Calcd. [%] For C26H33BrN2O2: C, 64.33; H, 6.85; N, 5.77. Found: C, 64.45; H, 6.90; N, 5.71.

4-{4-[5-(4-*t*-Butylphenyl)-1,3,4-oxadiazol-2-yl]phenyl}-2-methyl-but-3-yn-2-ol (**2a**):

A mixture of compound **1a** (30.0 g, 84.0 mmol) and (41.0 mL, 420 mmol) of 2-methyl-3-butyn-2-ol was dissolved in 250 mL of triethylamine and 20 mL of DMF. The mixture was refluxed under nitrogen atmosphere for 1 h. and then added Pd[P(C6H5)3]2Cl2 (0.1 g), CuI (0.1 g) and triphenylphosphine (0.1 g) in the reaction mixture. After the completion of the reaction, the mixture was cooled down to room temperature. And the insolubles were removed by filtration. The solvent was removed by evaporation under a reduced pressure to obtain a crude product The product was purified by column chromatography on a silica gel column using n-hexane/ethyl acetate = 1/1 (v/v) as an eluent. The yield was 23.5g (77.5%). m.p.: 140 oC. 1H NMR (300 MHz, CDCl3, ppm): 1.4 (s, 9H, -ArC(C*H*3)3), 1.6 (s, 6H, -ArC(C*H*3)2 OH), 7.6-8.1 (m, 8H, aromatic C-*H*). FTIR (KBr, cm-1): 3475 (O-H stretching ), 3023 (aromatic C-H stretching), 2955 (aliphatic C-H stretching), 1601, 1464 (aromatic C=C stretching), 1586 (C=N stretching), 1022 (C-O stretching), 725 (aromatic =C-H out-of plane vibration). Elemental analysis: Calcd. [%] for C23H24N2O2: C, 76.64 ; H, 6.71 ; N, 7.77. Found: C, 76.90 ; H, 6.59 ; N, 7.91.

4-{4-[5-(4-dodecyloxyphenyl)-1,3,4-oxadiazol-2-yl]phenyl}-2-methyl-but-3-yn-2-ol (**2b**)

Compound **2b** was synthesized in the same manner as described above in the preparation of compound **2a**. m.p.: 114 oC.

1H NMR (300 MHz, CDCl3, ppm): 0.85-1.84 (m, 23H, -OCH2(CH2)10CH3), 4.00-4.04 (t, 2H, -OCH2), 6.98-7.01 (d, 2H, Ar-H), 7.50-7.53 (d, 2H, Ar-H), 8.02-8.09 (m, 4H, Ar-H). FTIR (KBr, cm-1): 3478 (O-H stretching), 3028 (aromatic C-H stretching), 2965 (aliphatic C-H stretching), 1598, 1460 (aromatic C=C stretching), 1584 (C=N stretching), 1021 (C-O stretching). Elemental analysis: Calcd. [%] for C31H40N2O3: C, 76.19; H, 8.25; N, 5.73. Found: C, 76.26; H, 8.30; N, 5.67.

2-(4-*t*-Butylphenyl)-5-(4-ethynylphenyl)-1,3,4-oxadiazole (**3a**):

A mixture of compound **2a** (22.0 g, 61.0 mmol) and NaH (4.4 g, 183 mmol) was refluxed for 1 h in 250 mL of toluene. It was cooled down to room temperature and then poured into distilled water. 1 M HCl solution was added to neutralize the reaction mixture. The product was extracted with diethlyether several times. After the extraction, the solvent was removed by evaporation under a reduced pressure to obtain a crude product. The product was purified by column chromatography on a silica gel column using n-hexane/ethyl acetate = 1/1 (v/v) as an eluent and then dried in a vacuum oven for 1 day. The yield was 11.2g (60.5%). m.p.: 133 oC.

1H NMR (300 MHz, CDCl3, ppm): 1.4 (s, 9H, -ArC(C*H*3)3), 3.3 (s, 1H, -C≡C-*H*), 7.5-8.1 (m, 8H, aromatic C-*H*). FTIR (KBr, cm-1): 3235 (≡C-H stretching), 3068 (aromatic C-H stretching), 2965 (aliphatic C-H stretching), 2100 (-C≡C- stretching), 1604, 1487 (aromatic C=C stretching), 1675 (C=N stretching), 1025 (C-O stretching), 725 (aromatic =C-H out-of plane vibration). Elemental analysis: Calcd. [%] for C20H18N2O: C, 79.44 ; H, 6.00 ; N, 9.26 Found: C, 79.31 ; H, 6.10 ; N, 9.31.

2-(4-dodecyloxyphenyl)-5-(4-ethynylphenyl)-1,3,4-oxadiazole (**3b**):

Compound **3b** was synthesized in the same manner as described above in the preparation of compound **3a**. m.p.: 102 oC.

1H NMR (300 MHz, CDCl3, ppm): 0.85-1.84 (m, 23H, -OCH2(CH2)10CH3), 3.28 (s, 1H, -C≡C-H), 4.00-4.04 (t, 2H, -OCH2), 6.98-7.01 (d, 2H, Ar-H), 7.50-7.53 (d, 2H, Ar-H), 8.01-8.09 (m, 4H, Ar-H). FTIR (KBr, cm-1): 3234 (≡C-H stretching), 3060 (aromatic C-H stretching), 2961 (aliphatic C-H stretching), 2102 (-C≡C- stretching), 1608, 1489 (aromatic C=C stretching), 1676 (C=N stretching), 1022 (C-O stretching). Elemental analysis: Calcd. [%] for C28H34N2O2: C, 78.10 ; H, 7.96 ; N, 6.51 Found: C, 78.20 ; H, 8.11 ; N, 6.46.

9,10-Bis(2-{4-[5-(4-*t*-butylphenyl)-1,3,4-oxadiazole-2-yl]phenyl}ethynyl)anthracene (**4a**) (**ANTH-OXA2t-tBu)**

A mixture of 9,10-Dibromoanthracene 1.0 g (3.0 mmol) and 2.0 g (7.2 mmol) of compound **3a**, was dissolved in 10 mL of triethylamine and 10 mL of DMF. The mixture was refluxed under nitrogen atmosphere for 1 h. and then added Pd[P(C6H5)3]2Cl2 (0.1 g), CuI (0.1 g) and triphenylphosphine (0.1 g) in the reaction mixture. After the completion of the reaction, the mixture was cooled down to room temperature. And the precipitate was filterd. The product was purified by recrystallization using chloroform/methanol = 1/3 (v/v) as an eluent. The yield was 1.93 g (88.5%). Tg: 180 oC, >350 oC dec..

1H NMR (300 MHz, CDCl3, ppm): 1.39 (s, 18H, -ArC(CH3)3), 7.56-7.59 (d, 4H, Ar-H), 7.70-7.73 (m, 4H, Ar-H), 7.92-7.95 (d, 4H, Ar-H), 8.09-8.12 (d, 4H, Ar-H), 8.23-8.25 (d, 4H, Ar-H), 8.70-8.73 (m, 4H, Ar-H),. FTIR (KBr, cm-1): 3067 (aromatic C-H stretching), 2971 (aliphatic C-H stretching), 1604, 1487 (aromatic C=C stretching), 1025 (C-O stretching). Elemental analysis: Calcd. [%] for C54H42N4O2: C, 83.26 ; H, 5.43 ; N, 7.19 Found: C, 83.51 ; H, 5.24 ; N, 7.14.

9,10-Bis(2-{4-[5-(4-dodecyloxyphenyl)-1,3,4-oxadiazole-2-yl]phenyl}ethynyl) anthracene (**4b**) (**ANTH- OXA2t-OC12)**

Compound **4b** was synthesized in the same manner as described above in the preparation of compound **4a**, m. p.: 242 oC and Tg: 183 oC.

1H NMR (300 MHz, CDCl3, ppm): 0.85-1.84 (m, 46H, -OCH2(CH2)10CH3), 4.00-4.04 (t, 4H, -OCH2), 6.98-7.01 (d, 4H, Ar-H), 7.70-7.73 (m, 4H, Ar-H), 7.92-7.95 (d, 4H, Ar-H), 8.09-8.12 (d, 4H, Ar-H), 8.23-8.25 (d, 4H, Ar-H), 8.70-8.73 (m, 4H, Ar-H). FTIR (KBr, cm-1): 3068 (aromatic C-H stretching), 2965 (aliphatic C-H stretching), 1600, 1489 (aromatic C=C stretching), 1027 (C-O stretching). Elemental analysis: Calcd. [%] for C70H74N4O4: C, 81.20 ; H, 7.20 ; N, 5.41 Found: C, 81.35 ; H, 7.34 ; N, 5.20.

2-(3,5-Dibromophenyl)-5-(4-iodophenyl)-1,3,4-oxadiazole (**5**):

Compound **5** was synthesized in the same manner as described above in the preparation of compound **1a**. m.p.: 164 oC.

1H NMR (300 MHz, CDCl3, ppm): 7.27-7.93 (m, 5H, Ar-H), 8.21 (s, 2H, Ar-H). FTIR (KBr, cm-1): 3064 (aromatic C-H stretching), 2962 (aliphatic C-H stretching), 1602, 1474 (aromatic C=C stretching), 1577 (C=N stretching), 1011 (C-O stretching). Elemental analysis: Calcd. [%] For C14H7Br2IN2O: C, 33.24 ; H, 1.39 ; N, 5.54. Found: C, 33.40 ; H, 1.48 ; N, 5.48.

4-{4-[5-(3,5-dibromophenyl)-1,3,4-oxadiazol-2-yl]phenyl}-2-methyl-but-3-yn-2-ol (**6**):

Compound **6** was synthesized in the same manner as described above in the preparation of compound **2a**. m.p.: 176 oC.

1H NMR (300 MHz, CDCl3, ppm): 1.65 (s, 6H, -ArC(CH3)2 OH), 7.58-7.60 (d, 2H, Ar-H), 7.86 (s, H, Ar-H), 8.08-8.11 (d, 2H, Ar-H), 8.23 (s, 2H, Ar-H). FTIR (KBr, cm-1): 3472 (O-H stretching ), 3023 (aromatic C-H stretching), 2955 (aliphatic C-H stretching), 1601, 1464 (aromatic C=C stretching), 1586 (C=N stretching), 1022 (C-O stretching). Elemental analysis: Calcd. [%] for C19H14Br2N2O2: C, 49.38 ; H, 3.05 ; N, 6.06. Found: C, 49.44 ; H, 3.14 ; N, 6.01.

2-[3,5-Bis(2-{4-[5-(4-*t*-Butylphenyl)-1,3,4-oxadiazole-2-yl]phenyl}ethynyl)phenyl]-5-(4-ethynylphenyl)-1,3,4-oxadiazole (**7a**)

Compound **7a** was synthesized in the same manner as described above in the preparation of compound **3a**.

1H NMR (300 MHz, CDCl3, ppm): 1.39 (s, 18H, -C(CH3)3), 3.28 (s, 1H, -C≡C-H), 7.55-7.58 (d, 4H, Ar-H), 7.66-7.68 (d, 2H, Ar-H), 7.72-7.75 (d, 4H, Ar-H), 7.91 (s, 1H, Ar-H), 8.06-8.19 (m, 10H, Ar-H), 8.23 (s, 2H, Ar-H). FTIR (KBr, cm-1): 3236 (≡C-H stretching), 3060 (aromatic C-H stretching), 2967 (aliphatic C-H stretching), 2100 (-C≡C- stretching), 1610, 1497 (aromatic C=C stretching), 1020 (C-O stretching). Elemental analysis: Calcd. [%] for C56H42N6O3: C, 79.41 ; H, 5.00 ; N, 9.92 Found: C, 79.47 ; H, 5.10 ; N, 9.86. MALDI-TOF MS: Calcd. for C56H43N6O3 (MH+) 847.3, Found: 847.7.

2-[3,5-Bis(2-{4-[5-(4-dodecyloxyphenyl)-1,3,4-oxadiazole-2-yl]phenyl}ethynyl) phenyl]-5-(4-ethynylphenyl)-1,3,4-oxadiazole (**7b**)

Compound **7b** was synthesized in the same manner as described above in the preparation of compound **3a**.

1H NMR (300 MHz, CDCl3, ppm): 0.85-1.84 (m, 46H, -OCH2(CH2)10CH3), 3.28 (s, 1H, -C≡C-H), 4.00-4.04 (t, 4H, -OCH2), 6.98-7.01 (d, 4H, Ar-H), 7.50-7.53 (d, 2H, Ar-H), 7.62-7.65 (d, 4H, Ar-H), 7.79 (s, 1H, Ar-H), 8.01-8.09 (m, 10H, Ar-H), 8.18 (s, 2H, Ar-H). FTIR (KBr, cm-1): 3235 (≡C-H stretching), 3068 (aromatic C-H stretching), 2965 (aliphatic C-H stretching), 1604, 1487 (aromatic C=C stretching), 1025 (C-O stretching). Elemental analysis: Calcd. [%] for C72H74N6O5: C, 78.37 ; H, 6.76 ; N, 7.62 Found: C, 78.29 ; H, 6.68 ; N, 7.54. MALDI-TOF MS: Calcd. for C72H75N6O5 (MH+) 1103.6, Found: 1103.9.

9,10-Bis-[2-{4-(5-[3,5-Bis-{2-(4-[5-{4-t-butylphenyl}oxadiazol-2-yl]phenyl)ethynyl} phenyl]oxadizol-2-yl)phenyl}ethynyl]anthracene (**8a**) (**ANTH-OXA6t-tBu)**

Compound **8a** was synthesized in the same manner as described above in the preparation of compound **4a,** m. p.: 293 oC (dec.) and Tg: 218 oC.

1H NMR (300 MHz, CDCl3, ppm): 1.39 (s, 36H, -C(CH3)3), 7.21-8.70 (s, 54H, Ar-H). FTIR (KBr, cm-1): 3064 (aromatic C-H stretching), 2960 (aliphatic C-H stretching), 1600, 1485 (aromatic C=C stretching), 1020 (C-O stretching). Elemental analysis: Calcd. [%] for C126H90N12O6: C, 81.01 ; H, 4.86 ; N, 9.00 Found: C, 80.83 ; H, 5.00 ; N, 9.67. MALDI-TOF MS: Calcd. for C126H91N12O6 (MH+) 1867.7, Found: 1867.2.

9,10-Bis-[2-{4-(5-[3,5-Bis-{2-(4-[5-{4-dodecyloxyphenyl}oxadizol-2-yl]phenyl) ethynyl}phenyl]oxadizol-2-yl)phenyl}ethynyl]anthracene (**8b**) (**ANTH-OXA6t-OC12)**

Compound **8b** was synthesized in the same manner as described above in the preparation of compound **4a,** m. p.: 283 oC (dec.) and Tg: 211 oC.

1H NMR (300 MHz, CDCl3, ppm): 0.85-1.84 (m, 92H, -OCH2(CH2)10CH3), 4.00-4.04 (s, 8H, -OCH2), 6.94-8.70 (m, 54H, Ar-H). FTIR (KBr, cm-1): 3067 (aromatic C-H stretching), 2968 (aliphatic C-H stretching), 1609, 1482 (aromatic C=C stretching), 1022 (C-O stretching). Elemental analysis: Calcd. [%] for C158H154N12O10: C, 79.70; H, 6.52; N, 7.06 Found: C, 80.03; H, 6.68; N, 6.86. MALDI-TOF MS: Calcd. for C158H155N12O10 (MH+) 2380.2, Found: 2379.9.
